# Supplementary material
Source: publisher figshare collection journal article supplement (https://tandf.figshare.com/articles/dataset/_/9785693)
Supplement: Supplementary file 1 [file 1]

**Supplementary Table 1. The twenty highest intensity damage sites in Mito 15**

| Base<br>number | Sequence    |    |             | Damage<br>percentage |
|----------------|-------------|----|-------------|----------------------|
| 161            | ATACAACAAT  | T* | ACACCACCCA  | 1.46                 |
| 67             | CGAACGTACG  | G* | ACGTCCAGCT  | 1.41                 |
| 239            | ATACAACCTCA | G* | GACATTTCATC | 1.26                 |
| 71             | CGTACGGACG  | T* | CCAGCTGAGA  | 1.22                 |
| 59             | ATGCGGTTCG  | A* | ACGTACGGAC  | 1.22                 |
| 63             | GGTTCGAACG  | T* | ACGGACGTCC  | 1.01                 |
| 75             | CGGACGTCCA  | G* | CTGAGATCTC  | 1.00                 |
| 43             | GTCGATACTG  | G* | TACTAATGCG  | 0.98                 |
| 286            | ACCAATGATC  | G* | TGTCTCTCAA  | 0.94                 |
| 91             | ATCTCCTAGG  | G* | GCCTCTTACC  | 0.94                 |
| 219            | CTCATATCCC  | G* | ACACTGATCA  | 0.94                 |
| 299            | TCTCTCAAGA  | G* | GGTCATCCAA  | 0.86                 |
| 117            | TCCACATACT  | T* | GTAATCCAC   | 0.86                 |
| 90             | GATCTCCTAG  | G* | GGCCTCTTAC  | 0.83                 |
| 240            | TACAACCTCAG | G* | ACATTCATCC  | 0.80                 |
| 301            | TCTCAAGAGG  | G* | TCATCCAATT  | 0.77                 |
| 180            | CACTCACTCG  | G* | GGTAACACAA  | 0.76                 |
| 345            | CGCTCCCATG  | G* | CTCGAGCTTA  | 0.73                 |
| 300            | CTCTCAAGAG  | G* | GTCATCCAAT  | 0.72                 |
| 81             | TCCAGCTGAG  | A* | TCTCCTAGGG  | 0.72                 |

Data from three independent ionising radiation damage experiments were averaged to determine the 20 most intense damage sites which are listed in descending order with the surrounding sequence context (written 5' to 3') and damage percentage. \* indicates the damaged nucleotide.

**Supplementary Table 2. The twenty highest intensity damage sites in T7.GCGT.G10**

| Base<br>number | Sequence    |    |             | Damage<br>percentage |
|----------------|-------------|----|-------------|----------------------|
| 59             | ATGCGGTTTCG | A* | GGGATTGGGA  | 1.68                 |
| 50             | CTGGTACTAA  | T* | GCGGTTTCGAG | 1.38                 |
| 273            | GTCGTGTAGG  | G* | GGAAAGCGGT  | 0.96                 |
| 73             | ATTGGGATTG  | G* | GATTGGGATT  | 0.92                 |
| 257            | GTTGAATTAG  | C* | GGAACGTCGT  | 0.92                 |
| 246            | GACCGCAATG  | G* | GTTGAATTAG  | 0.84                 |
| 67             | CGAGGGATTG  | G* | GATTGGGATT  | 0.83                 |
| 52             | GGTACTAATG  | C* | GGTTCGAGGG  | 0.82                 |
| 61             | GCGGTTTCGAG | G* | GATTGGGATT  | 0.82                 |
| 256            | GGTTGAATTA  | G* | CGGAACGTCG  | 0.82                 |
| 259            | TGAATTAGCG  | G* | AACGTCGTGT  | 0.80                 |
| 229            | AGCACTGACC  | C* | TTTTGGGACC  | 0.80                 |
| 86             | TTGGGATTGG  | G* | ATTGGGATTG  | 0.80                 |
| 91             | ATTGGGATTG  | G* | GATTGGGATT  | 0.79                 |
| 80             | TTGGGATTGG  | G* | ATTGGGATTG  | 0.77                 |
| 115            | GGGGCCCATG  | G* | CTCGATTTTT  | 0.77                 |
| 33             | TGTGTCCTTT  | G* | TCGATACTGG  | 0.76                 |
| 247            | ACCGCAATGG  | G* | TTGAATTAGC  | 0.76                 |
| 97             | ATTGGGATTG  | G* | GATTCTAGGG  | 0.75                 |
| 74             | TTGGGATTGG  | G* | ATTGGGATTG  | 0.74                 |

Data from three independent ionising radiation damage experiments were averaged to determine the 20 most intense damage sites which are listed in descending order with the surrounding sequence context (written 5' to 3') and damage percentage. \* indicates the damaged nucleotide.

**Supplementary Table 3. The twenty highest intensity damage sites in the J clone.**

| Base<br>number | Sequence    |    |            | Damage<br>percentage |
|----------------|-------------|----|------------|----------------------|
| 59             | ATGCGGTTTCG | A* | ATGAAGAGTA | 1.71                 |
| 174            | GTATTTTGGG  | G* | GGGGGGTTTA | 1.57                 |
| 364            | TTAGCGGAAC  | G* | TCGTGTAGGG | 1.16                 |
| 97             | TGTTTGTATT  | G* | TTTAATTATT | 1.15                 |
| 67             | CGAATGAAGA  | G* | TAATGATGTA | 1.08                 |
| 155            | TATGTATTTG  | G* | GTTTTATGGT | 1.08                 |
| 173            | GGTATTTTGG  | G* | GGGGGGGTTT | 1.06                 |
| 43             | GTCGATACTG  | G* | TACTAATGCG | 0.93                 |
| 92             | GTTTATGTTT  | G* | TATTGTTTAA | 0.93                 |
| 148            | GTTTATTTAT  | G* | TATTTGGGTT | 0.93                 |
| 134            | TATTTATTTG  | G* | GGGGTTTATT | 0.91                 |
| 114            | TATTTATTTT  | G* | TTATTGTTTT | 0.86                 |
| 342            | TTTGGGACCG  | C* | AATGGGTTGA | 0.86                 |
| 44             | TCGATACTGG  | T* | ACTAATGCGG | 0.86                 |
| 164            | GGGTTTTATG  | G* | TATTTTGGGG | 0.85                 |
| 198            | ATGGTATTTG  | G* | GTTTATTTTA | 0.85                 |
| 54             | TACTAATGCG  | G* | TTCGAATGAA | 0.83                 |
| 72             | GAAGAGTAAT  | G* | ATGTAGTTTG | 0.82                 |
| 120            | TTTTGTTATT  | G* | TTTTATTTAT | 0.80                 |
| 348            | ACCGCAATGG  | G* | TTGAATTAGC | 0.80                 |

Data from three independent ionising radiation damage experiments were averaged to determine the 20 most intense damage sites which are listed in descending order with the surrounding sequence context (written 5' to 3') and damage percentage. \* indicates the damaged nucleotide.
